# Supplementary material for: PULSE-I - Is rePetitive Upper Limb SEnsory stimulation early after stroke feasible and acceptable? A stratified single-blinded randomised controlled feasibility study
Source: Trials. 2019 Jul 1;20:388. doi: 10.1186/s13063-019-3428-y (PMC6604268; doi:10.1186/s13063-019-3428-y)
Supplement: Supplementary file 3 — Anonymised data used during the analysis. (XLSX 12 kb) [file 13063_2019_3428_MOESM3_ESM.xlsx]

## Sheet: Sheet1
TrialID	StrokeToRandomisation	RandomisedTO	Age	Gender	NHSSArmScore	DominantHand	NHSSArmGroup	PreStrokeRankinScore	TotalNHSSScore	FMA_UE	InitialArat	9HPT	ChangeARAT2Wks	ChangeARAT3Mths	ChangeFMA-UE2Wks	ChangeFMA-UE3Mths	Change9HPT2Wks	Change9HPT3Mths
21	4	RSS+Standard Theapy	86	Male	4	Right	NIHSS arm score 3-4	2	8	51	0	300	0	19	12	-1	0	0
22	2	RSS+Standard Theapy	80	Female	2	Right	NIHSS arm score 1-2	1	7	97	29	300	16	27	21	1	-202	-248
23	2	RSS+Standard Theapy	63	Male	4	Right	NIHSS arm score 3-4	2	16	56	0	300	0	0	13	0	0	0
24	6	Standard Therapy	60	Female	4	Right	NIHSS arm score 3-4	1	12	79	6	300	30	45	17	-4	0	-233
25	2	RSS+Standard Theapy	76	Male	1	Left	NIHSS arm score 1-2	0	2	92	53	29	4	2	30	0	-6.06	-6.06
26	12	Standard Therapy	77	Female	3	Right	NIHSS arm score 3-4	1	5	109	38	40	-7	7	-11	-2	0.78	11.78
28	2	Standard Therapy	86	Female	1	Right	NIHSS arm score 1-2	1	2	100	50	300	6	7	14	1	-248	-247
30	4	RSS+Standard Theapy	63	Male	1	Right	NIHSS arm score 1-2	0	6	116	57	87	0	0	4	-2	-48.26	-55.26
31	4	RSS+Standard Theapy	82	Female	1	Right	NIHSS arm score 1-2	1	7	65	0	300	19	26	15	-1	0	-87
32	2	RSS+Standard Theapy	59	Male	1	Right	NIHSS arm score 1-2	0	17	43	0	300	0	17	-1	8	0	0
33	4	RSS+Standard Theapy	64	Male	3	Right	NIHSS arm score 3-4	1	2	116	47	300	6	10	8	-7	-141	-162
34	5	Standard Therapy	87	Female	1	Right	NIHSS arm score 1-2	0	9	111	57	41	-1	0	9	4	26.07	-2.93
35	3	RSS+Standard Theapy	81	Male	2	Right	NIHSS arm score 1-2	2	3	105	35	300	10	16	14	1	0	-159
36	2	Standard Therapy	70	Male	1	Left	NIHSS arm score 1-2	2	3	103	51	181	-4	4	7	0	-130.66	-112.66
37	2	RSS+Standard Theapy	72	Male	1	Right	NIHSS arm score 1-2	0	3	118	48	63	8	9	6	5	-29.46	-33.46
38	3	RSS+Standard Theapy	90	Female	1	Right	NIHSS arm score 1-2	2	5	99	56	47	0	1	14	-1	17.2	-9.8
40	4	RSS+Standard Theapy	65	Female	1	Right	NIHSS arm score 1-2	1	3	111	39	300	17	18	10	0	-248	-269
41	3	Standard Therapy	74	Male	1	Left	NIHSS arm score 1-2	1	2	104	32	300	23	25	18	2	-243	-265
42	4	Standard Therapy	77	Female	2	Right	NIHSS arm score 1-2	3	7	75	0	300	21	42	22	3	0	0
43	9	Standard Therapy	70	Male	1	Right	NIHSS arm score 1-2	0	2	116	53	42	4	4	6	0	-14.77	-10.77
44	2	Standard Therapy	78	Female	3	Left	NIHSS arm score 3-4	2	7	110	47	27	10	10	9	5	1.91	2.91
45	13	Standard Therapy	53	Male	4	Right	NIHSS arm score 3-4	2	12	36	0	300	0	11	-2	-2	0	0
46	5	RSS+Standard Theapy	67	Female	1	Right	NIHSS arm score 1-2	1	4	95	20	195	37	37	26	2	-161.73	-162.73
47	6	RSS+Standard Theapy	78	Female	1	Right	NIHSS arm score 1-2	1	3	103	50	75	7	7	18	-1	-38.6	-44.6
48	11	RSS+Standard Theapy	86	Female	4	Right	NIHSS arm score 3-4	2	4	82	3	300	19	35	6	-8	0	0
49	5	RSS+Standard Theapy	72	Female	2	Right	NIHSS arm score 1-2	1	9	91	26	300	30	31	21	-2	-220	-256
50	4	Standard Therapy	82	Female	2	Right	NIHSS arm score 1-2	3	9	87	0	300	21	55	1	5	0	-125
51	12	Standard Therapy	88	Female	2	Right	NIHSS arm score 1-2	2	8	62	0	300	0		-8		0
52	14	Standard Therapy	73	Female	4	Right	NIHSS arm score 3-4	1	27	109	57	32	-9	0	-1	-2	2.25	9.05
53	3	Standard Therapy	63	Male	1	Right	NIHSS arm score 1-2	1	6	117	54	65	3	3	5	1	-33.76	-33.96
54	8	RSS+Standard Theapy	71	Female	4	Right	NIHSS arm score 3-4	3	7	52	0	300	0	0	-1	1	0	0
55	6	Standard Therapy	63	Male	1	Right	NIHSS arm score 1-2	2	5	114	57	40	0	0	8	0	-7.28	-6.38
56	6	RSS+Standard Theapy	73	Male	1	Right	NIHSS arm score 1-2	1	8	112	41	149	13	16	7	-2	-89.31	-119.61
57	6	Standard Therapy	92	Female	1	Right	NIHSS arm score 1-2	3	4	106	39	300	4	18	4	0	-252	-254.6
58	5	RSS+Standard Theapy	54	Female	2	Right	NIHSS arm score 1-2	0	6	105	26	300	24	31	33	-3	-282	-269.5
59	10	Standard Therapy	89	Female	4	Right	NIHSS arm score 3-4	3	20	54	0	300	0	0	0	-1	0	0
60	4	RSS+Standard Theapy	77	Male	1	Right	NIHSS arm score 1-2	1	3	86	3	300	38	51	31	0	0	-238.9
61	2	RSS+Standard Theapy	70	Male	1	Right	NIHSS arm score 1-2	2	5	99	5	300	36	49	2	-3	-235	-130
62	3	RSS+Standard Theapy	77	Female	4	Right	NIHSS arm score 3-4	1	10	48	0	300	0	0	7	0	0	0
63	5	RSS+Standard Theapy	37	Female	4	Right	NIHSS arm score 3-4	0	14	59	0	300	3	0	1	-1	0	0
